# Supplementary material
Source: PubMed Central journal article supplement (PMC2141903)

| Genotype<br>( <i>Dac</i> locus)  | <b>+/+</b>       | <b><i>Dac</i><sup>1J</sup>/<i>Dac</i><sup>1J</sup></b> |                  | <b><i>Dac</i><sup>2J</sup>/<i>Dac</i><sup>2J</sup></b> |                  |
|----------------------------------|------------------|--------------------------------------------------------|------------------|--------------------------------------------------------|------------------|
| Genotype<br>( <i>Mdac</i> locus) | <i>mdac/mdac</i> | <i>mdac/mdac</i>                                       | <i>Mdac/mdac</i> | <i>mdac/mdac</i>                                       | <i>Mdac/mdac</i> |
| Phenotype                        | <b>N</b>         | <b>D</b>                                               | <b>N</b>         | <b>D</b>                                               | <b>N</b>         |
|                                  | <b>1</b>         | <b>0.92</b>                                            | <b>0.96</b>      | <b>0.0047</b>                                          | <b>0.0038</b>    |

***dactylin***

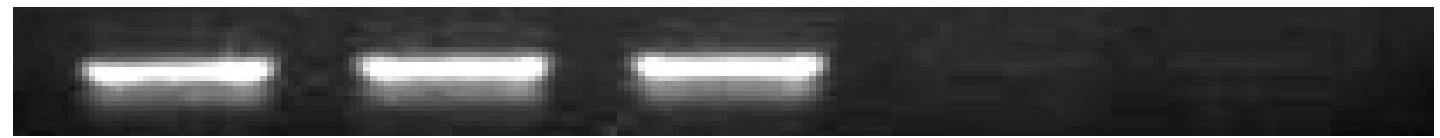

***Actb***

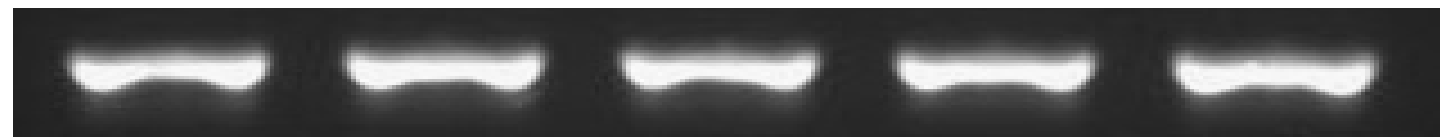

Supplement: pnas_0705483104_1.pdf [file pnas_0705483104_1.pdf]
