# Supplementary material
Source: PubMed Central journal article supplement (PMC2141903)

NW\_001030622

5' LTR

3' LTR

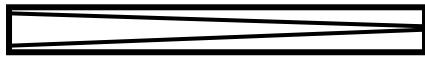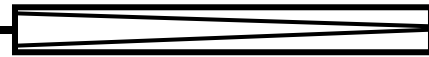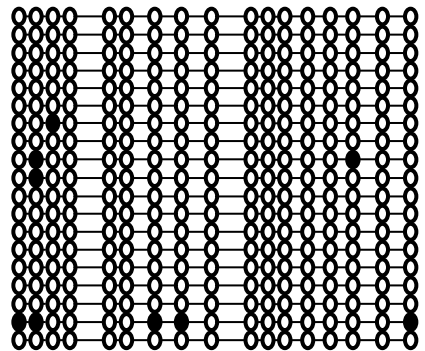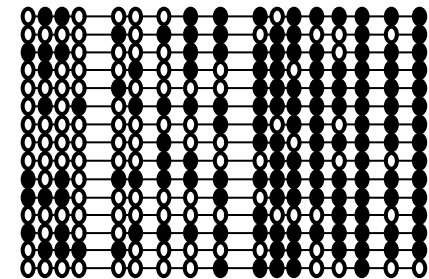

*(mdac/mdac)*

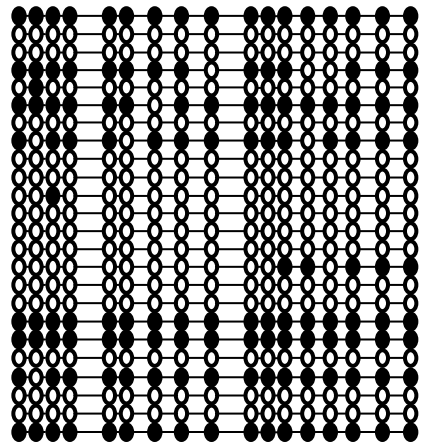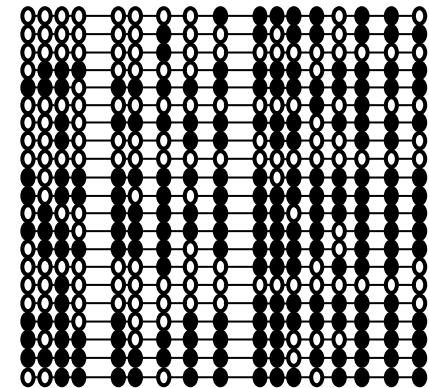

*(Mdac/mdac)*

Supplement: pnas_0705483104_2.pdf [file pnas_0705483104_2.pdf]
